# Supplementary material for: Integrating P2 into O′3 toward a robust Mn-Based layered cathode for sodium-ion batteries
Source: Royal Society of Chemistry journal article supplement (doi:10.1039/d0ta08383f), 2020-01-01

## Supporting Information

### Integrating P2 into O<sub>3</sub> toward a Robust Mn-Based Layered Cathode for Sodium-Ion Batteries

Zhaoguo Liu<sup>a</sup>, Kezhu Jiang<sup>a</sup>, Shiyong Chu<sup>a</sup>, Jianghua Wu<sup>a</sup>, Hang Xu<sup>a</sup>, Xueping Zhang<sup>a</sup>, Peng Wang<sup>ab</sup>, Shaohua Guo<sup>\*a</sup> and Haoshen Zhou<sup>\*ac</sup>

- Center of Energy Storage Materials & Technology, College of Engineering and Applied Sciences, Jiangsu Key Laboratory of Artificial Functional Materials, National Laboratory of Solid State Microstructures, Collaborative Innovation Center of Advanced Microstructure, Nanjing University, Nanjing 210093, China. E-mail: shguo@nju.edu.cn; hszhou@nju.edu.cn.
- Research Center for Environmental Nanotechnology (ReCENT), Nanjing University, 210023 Nanjing, China.
- Energy Technology Research Institute, National Institute of Advanced Industrial Science and Technology (AIST), Tsukuba 305-8565, Japan.

\*Corresponding authors.

E-mail addresses: shguo@nju.edu.cn; hszhou@nju.edu.cn.

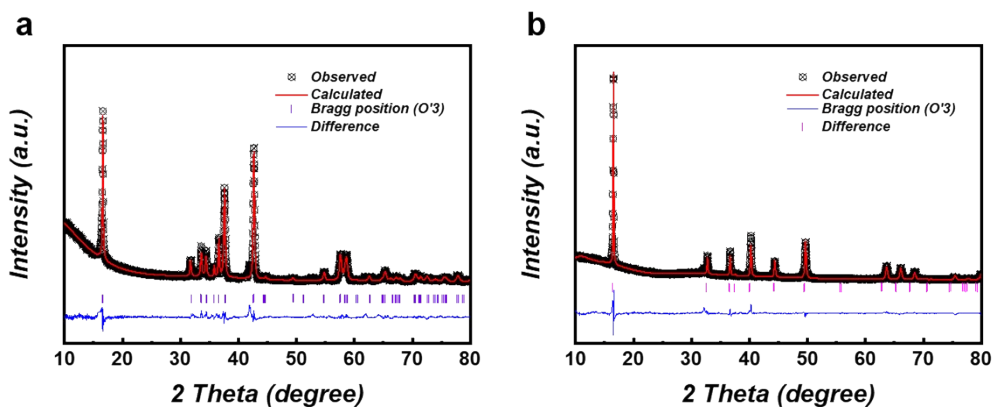

**Fig. S1** Rietveld refinement patterns of (a) O'3 NaMnO<sub>2</sub> (hereafter denoted as O'3 NMO) and (b) P2 Na<sub>0.67</sub>MnO<sub>2</sub> (denoted as P2 NaMO) using lab X-ray Diffraction data.

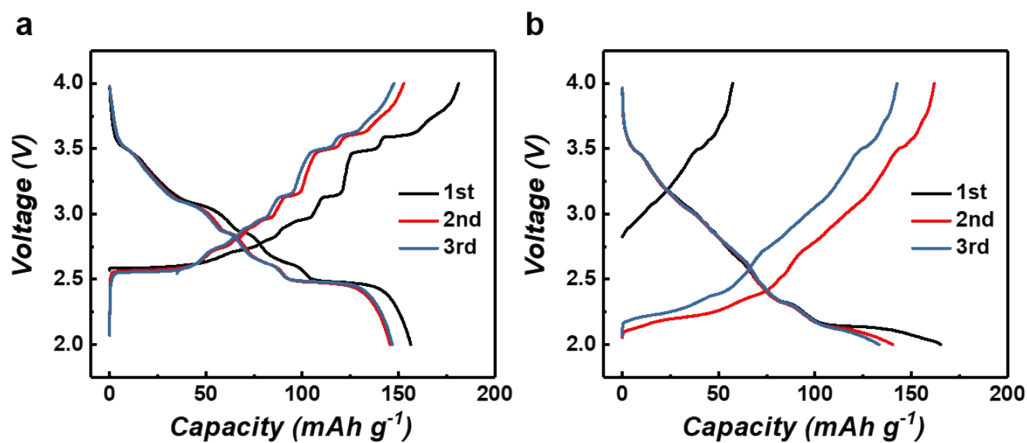

**Fig. S2** The galvanostatic charge/discharge curves at 0.1C in the voltage range of 2.0-4.0 V of (a) O'3 NMO and (b) P2 NaMO.

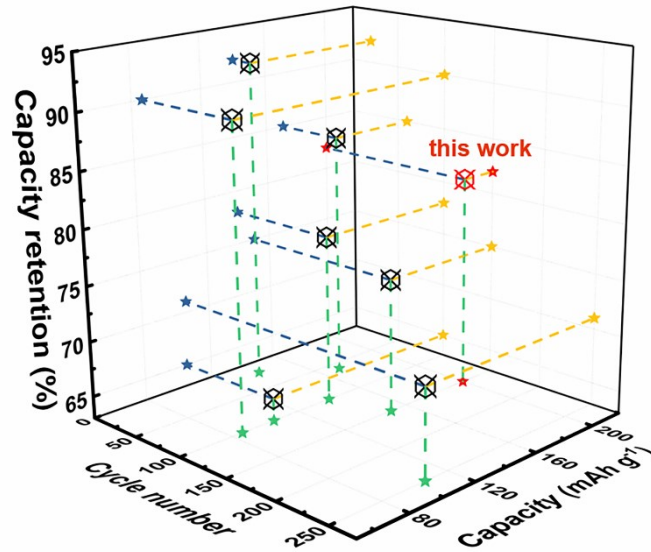

**Fig. S3** The Comparison of performance parameters including capacity, retention and cycle number between this work and other bi-phase structure materials.

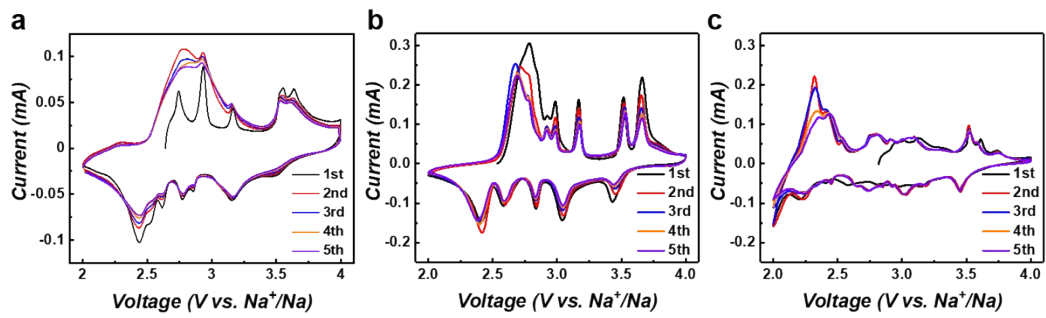

**Fig. S4** The Cyclic voltammogram of (a) P2/O'3 NMCSO, (b) O'3 NMO, and (c) P2 NaMO performed in the voltage region 2.0-4.0V at a scan rate of  $0.1 \text{ mV s}^{-1}$ .

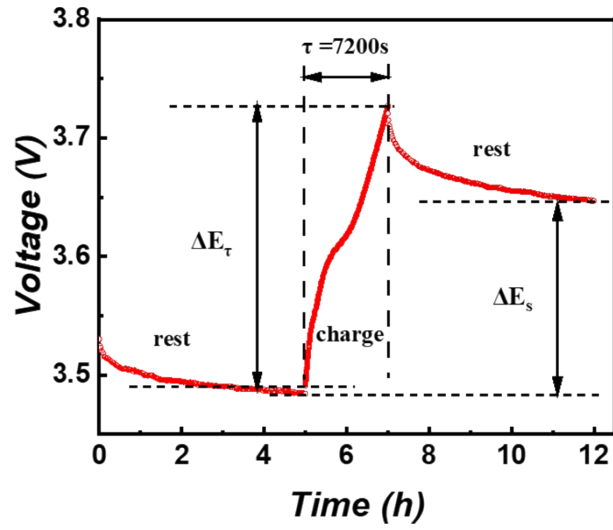

**Fig. S5** Detailed schematic diagram of a single-step GITT experiment at 0.1C in the voltage of ~3.5 V.

The GITT measurement was conducted to investigate the kinetics of sodium ions during the progresses of insertion and extraction. And the diffusion coefficients were determined according to the Equation S1.

$$D_{Na^+} = \frac{4}{\pi \cdot \tau} \left( \frac{m_B \cdot V_m}{M_B \cdot A} \right)^2 \left( \frac{\Delta E_s}{\Delta E_\tau} \right)^2 \left( \tau \ll L^2 / D_{Na^+} \right) \quad \text{Equation S1}$$

D is the diffusion coefficient,  $\tau$  is the pulse duration (7200s),  $m_B$  is the mass of the active materials,  $V_m$  is the molar volume,  $M_B$  is the molecular mass, A is the surface area,  $\Delta E_s$  and  $\Delta E_\tau$  are obtained via GITT curves as shown in Fig S5.

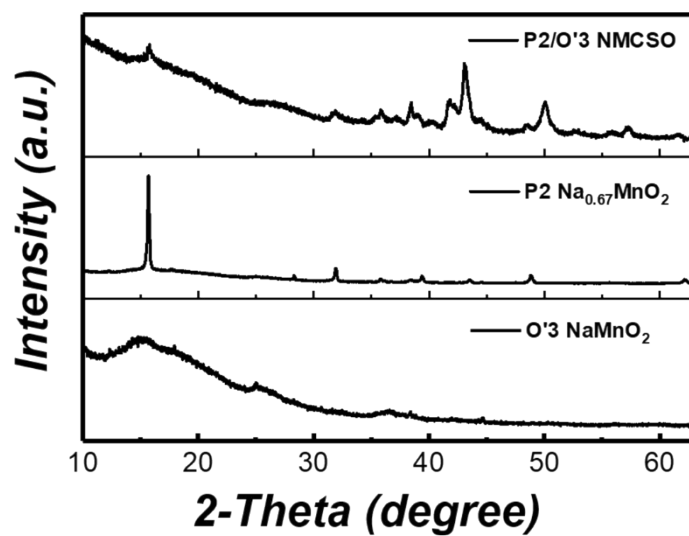

**Fig. S6** The XRD patterns of cathode electrodes that experience 200 charging and discharging cycles.

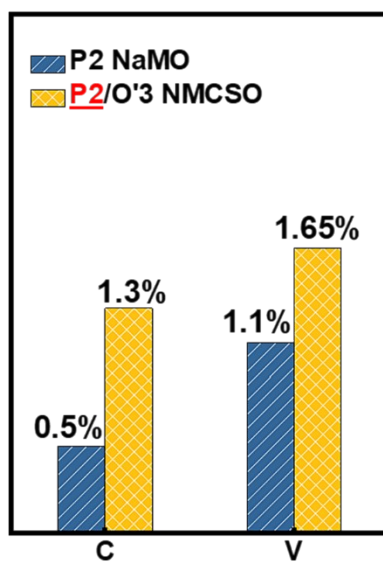

**Fig. S7** The comparison of parameters c and volume between P2/O'3 NMCSO and the P2 compound.

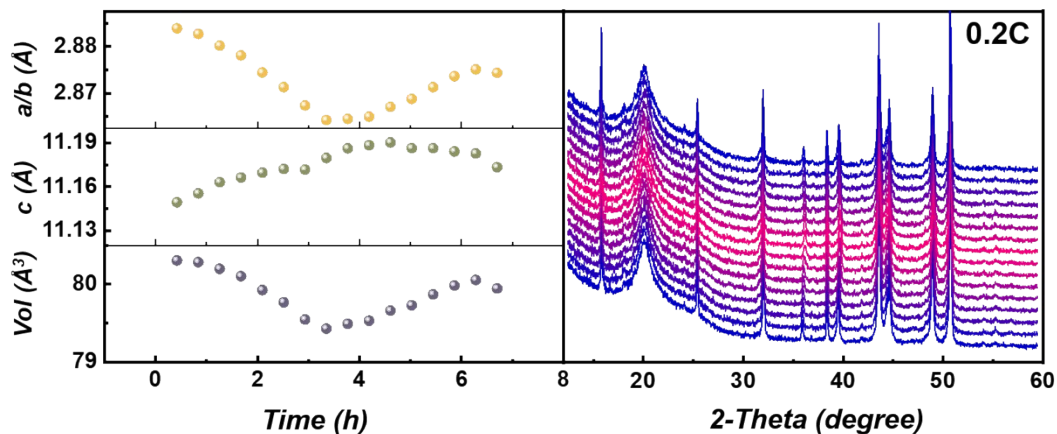

**Fig. S8** Structure transformation of P2 NaMO electrode utilizing in situ XRD and evolution of lattice parameters a, b, c and volume during the electrochemical sodiation/desodiation process.

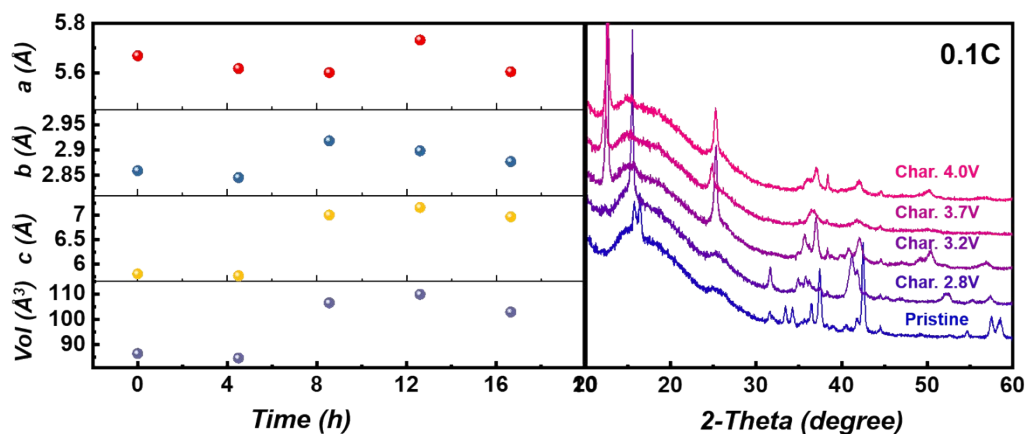

**Fig. S9** Structure transformation of O'3 NMO electrode utilizing ex situ XRD and evolution of lattice parameters a, b, c and volume during the electrochemical sodiation/desodiation process.

**Table S1.** The results of ICP-AES experience.

| Theoretical chemical formula                                    | Measured atomic ratio |       |       |       |
|-----------------------------------------------------------------|-----------------------|-------|-------|-------|
|                                                                 | Na                    | Mn    | Cu    | Sb    |
| $\text{NaMn}_{0.9}\text{Cu}_{0.067}\text{Sb}_{0.033}\text{O}_2$ | 1.005                 | 0.890 | 0.080 | 0.029 |

**Table S2.** Lattice parameters of the P2/O'3 NMCSO compound sample after Rietveld refinement.

| Phase             |                         | P2       | O'3     |
|-------------------|-------------------------|----------|---------|
| Space Group       |                         | P63/mmc  | C2/m    |
|                   | a(Å)                    | 2.89482  | 5.65073 |
|                   | b(Å)                    | 2.89482  | 2.86438 |
|                   | c(Å)                    | 11.17161 | 5.80847 |
| Cell Parameters   | $\alpha(^{\circ})$      | 90.000   | 90.000  |
|                   | $\beta(^{\circ})$       | 90.000   | 112.948 |
|                   | $\gamma(^{\circ})$      | 120.000  | 90.000  |
|                   | volume(Å <sup>3</sup> ) | 81.075   | 86.574  |
|                   | R <sub>wp</sub> (%)     |          | 6.75    |
| Agreement Factors | R <sub>p</sub> (%)      |          | 4.63    |
|                   | $\chi^2$                |          | 4.24    |
|                   | Phase Ratio             | 46.144   | 53.856  |

**Table S3.** Lattice parameters of the P2 Na<sub>0.67</sub>MnO<sub>2</sub> and O'3 NaMnO<sub>2</sub> compound samples after Rietveld refinement.

| Phase             |                         | P2 Na <sub>0.67</sub> MnO <sub>2</sub> | O'3 NaMnO <sub>2</sub> |
|-------------------|-------------------------|----------------------------------------|------------------------|
| Space Group       |                         | P63/mmc                                | C2/m                   |
| Cell Parameters   | a(Å)                    | 2.87777                                | 5.66622                |
|                   | b(Å)                    | 2.87777                                | 2.85731                |
|                   | c(Å)                    | 11.1446                                | 5.80144                |
|                   | $\alpha$ (°)            | 90.000                                 | 90.000                 |
|                   | $\beta$ (°)             | 90.000                                 | 113.144                |
|                   | $\gamma$ (°)            | 120.000                                | 90.000                 |
|                   | volume(Å <sup>3</sup> ) | 79.929                                 | 86.367                 |
| Agreement Factors | R <sub>wp</sub> (%)     | 8.67                                   | 10.16                  |
|                   | R <sub>p</sub> (%)      | 6.33                                   | 6.42                   |
|                   | $\chi^2$                | 4.74                                   | 4.47                   |

**Table S4.** The results of EIS experiments fitted via the following equivalent circuit.

| Sample       | R <sub>s</sub> (Ω) | R <sub>1</sub> (Ω) | R <sub>ct</sub> (Ω) |
|--------------|--------------------|--------------------|---------------------|
| P2/O'3 NMCSO | 3.341              | 60.3               | 57.2                |
| O'3 NMO      | 9.704              | 60.89              | 482.9               |

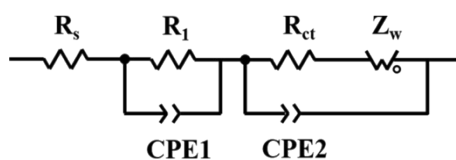

Supplement: d0ta08383f1.pdf [file d0ta08383f1.pdf]
